# Supplementary material for: Patient safety incidents in advance care planning for serious illness: a mixed-methods analysis
Source: PubMed Central journal article supplement — BMJ Support Palliat Care. 2019 Aug 28;12(e3):e403–10. doi: 10.1136/bmjspcare-2019-001824 (PMC9380496; doi:10.1136/bmjspcare-2019-001824), 2019-08-28
Supplement: bmjspcare-2019-001824supp001.pdf [file bmjspcare-2019-001824supp001.pdf]

**APPENDIX 1**

Keyword search terms:

advance care plan(s)

advance care planning

advance decision(s)

advance directive(s)

living will(s)

ACP

A.C.P.

A C P

A-C-P
